# Supplementary material for: Cluster-to-cluster charge transfer in a compound with a co-crystallized dye-anchored Ti6cluster and a classical Ti12cluster
Source: Royal Society of Chemistry journal article supplement (doi:10.1039/c9dt00812h), 2019-01-01
Supplement: c9dt00812h1.pdf [file c9dt00812h1.pdf]

**Electronic Supporting Information For**  
**Cluster-to-cluster charge-transfer in a compound with co-crystallized**  
**a dye anchored Ti<sub>6</sub> cluster and a classical Ti<sub>12</sub> cluster**

Huan Wang,<sup>a</sup> Dan-Hong Zou,<sup>b</sup> Guo-Qin Jiang\*<sup>a</sup> and Jie Dai\*<sup>b</sup>

<sup>a</sup>Department of General Surgery, The Second Affiliated Hospital of Soochow University, Suzhou 215004, P. R. China

<sup>b</sup>College of Chemistry, Chemical Engineering and Materials Science, Soochow University, Suzhou 215123, P. R. China

**Experimental Section**

**FIGURES**

**Fig. S1.** Structure of the TPA-dye.

**Fig. S2.** IR spectra of crystal **1**.

**Fig. S3.** <sup>1</sup>H NMR spectra of crystal **1**.

**Fig. S4.** The XRD patterns of crystalline sample **1**.

**Fig. S5.** Molecular packing of **1**.

**Fig. S6.** Photocurrents of **1** treated electrode with different amount of fructose.

**TABLE**

**Table S1** Crystal data and structural refinement parameters for **1**.

## Experimental Section

### Reagents and general instrument

All analytically pure reagents were purchased commercially and used without further purification. Compound  $[\text{Ti}_6\text{O}_4(\text{L}^1)_2(\text{BDC})_2(\text{O}^i\text{Pr})_{10}]$  abbreviated as  $\text{Ti}_6\text{-L}^1\text{-BDC}$  was prepared as that reported previously.<sup>1</sup> Elemental analyses of C, H and N were performed using a VARIDEL III elemental analyzer. The FT-IR spectra were recorded as KBr pellets on a Nicolet Magna 550 FT-IR spectrometer. <sup>1</sup>H NMR spectra were recorded on an AVANCE III HD-400 spectrometer. Solid-state room-temperature optical diffuse reflectance spectra of the micro crystal samples were obtained with a Shimadzu UV-2600 spectrometer. Room-temperature X-ray diffraction data were collected on a D/MAX-3C diffractometer using a Cu tube source (Cu-K $\alpha$ ,  $\lambda = 1.5406 \text{ \AA}$ ).

### Synthesis of compound

$[\text{Ti}_6\text{O}_2(\text{L}^1)_2(\text{Cat})_2(\text{O}^i\text{Pr})_{12}] \cdot [\text{Ti}_{12}\text{O}_{16}(\text{O}^i\text{Pr})_{16}] \cdot 2\text{HO}^i\text{Pr}$  (**1**). Analytically pure  $\text{Ti}(\text{O}^i\text{Pr})_4$  (0.05 mL, 0.17 mmol), 4-(diphenylamino)benzaldehyde (7.0 mg, 0.026 mmol), malonic acid (5.0 mg, 0.048 mmol) and catechol (3.0 mg, 0.027mmol) were mixed in 0.4 mL of anhydrous isopropanol. The mixture was placed in a thick Pyrex tube and quickly degassed by argon. The sealed tube was heated at 80 °C for 6 days and then cooled to room temperature to yield golden yellow crystals (32 % yield based on TPA). The crystals are rinsed with isopropanol and dried. The compound was preserved under a cool and dry environment. Anal. Calcd. for  $\text{C}_{146}\text{H}_{250}\text{N}_2\text{O}_{60}\text{Ti}_{18}$  (MW 3855.13): C, 45.49; H, 6.54; N, 0.73. Found: C, 45.21; H, 6.39; N, 0.58. Selected IR data (KBr,  $\text{cm}^{-1}$ ): 2972(m), 1588(w), 1548(m), 1480(w), 1400(m), 1325(m), 1124(vs), 1008(s), 946(m), 856(w), 736(m), 678(m), 613(w).

### X-ray crystallographic analysis

The single crystal measurement of **1** was carried out on a Bruker APEX-II CCD diffractometer with graphite monochromated  $\text{MoK}\alpha$  ( $\lambda = 0.71075 \text{ \AA}$ ) radiation. The structure was solved by direct methods using SHELXS-2016 and the refinement was performed against  $F^2$  using SHELXL-2016.<sup>2</sup> All the non-hydrogen atoms are refined anisotropically. Relevant crystal data, collection parameters, and refinement results can be found in Table S1.

### Theoretical calculations

Density functional theory calculations were carried out using GAUSSIAN 09 program package at the B3LYP level.<sup>3</sup> The basis set used for C, N, O and H atoms was 6-31G while effective core potentials with a LanL2DZ basis set was employed for Ti atoms. The crystal structure was used as the initial structures and the  $\text{O}^i\text{Pr}$  groups were replaced by OH groups to cut the computational cost with no significant change in the electronic properties.

### Electrode preparation and photocurrent measurement

The porous  $\text{TiO}_2/\text{ITO}$  electrode was prepared by spin coating then blading method using an ITO glass (8 ohm per square). The dye sensitized  $\text{TiO}_2$  electrodes for photocurrent measurements were prepared by soaking the  $\text{TiO}_2/\text{ITO}$  electrode in the solution of compound **1** ( $5 \times 10^{-4} \text{ mol L}^{-1}$ , based on a single dye unit, in a mixture of dichloromethane and isopropanol with volume ratio 1:1) for 20 h and then the electrodes were rinsed with the same solvent and dried in air. The light source was a 150-W high pressure xenon lamp, which was positioned 20 cm from the surface of the photoelectrode. The photoelectrochemical measurements were performed on a CHI660E electrochemistry workstation in a two-electrode cell for photocurrent measurements. The **1**

sensitized TiO<sub>2</sub> electrode was used as the anode electrode and a thermally platinized ITO plate as the cathode electrode. The effective irradiation area was about 0.5 cm<sup>2</sup>. An I<sub>2</sub>/I<sub>3</sub><sup>-</sup> solution (0.05 mol·L<sup>-1</sup> I<sub>2</sub>, 0.1 mol·L<sup>-1</sup> LiI, 0.6 mol·L<sup>-1</sup> TBAI in acetonitrile) was used as the electrolyte. For photoelectrochemical sensing to saccharides, a three-electrode system was conducted, including a **1** modified TiO<sub>2</sub> working electrode, a Pt plate auxiliary electrode and a saturated calomel reference electrode (SCE). An aqueous solution of Na<sub>2</sub>SO<sub>4</sub> (0.1 mmol·L<sup>-1</sup>) was used as the medium.

- 1 D.-H. Zou, L.-N. Cui, P.-Y. Liu, S. Yang, Q.-Y. Zhu and J. Dai, *Chem. Commun.*, 2018, **54**, 9933–9936.
- 2 (a) G. M. Sheldrick, *SHELXS-2016, Program for structure solution*; Universität of Göttingen: Germany, 2016. (b) Sheldrick, G. M. *SHELXL-2016, Program for structure refinement*; Universität of Göttingen: Göttingen, Germany, 2016. (c) G. M. Sheldrick, Crystal structure refinement with SHELXL. *Acta Cryst.*, 2015, **C71**, 3–8.
- 3 (a) *Gaussian 09, Revision A.1*, Gaussian Inc., Wallingford, CT, **2009**. (b) P. J. Hay and W. R. Wadt, *J. Chem. Phys.* **1985**, *82*, 270–283.

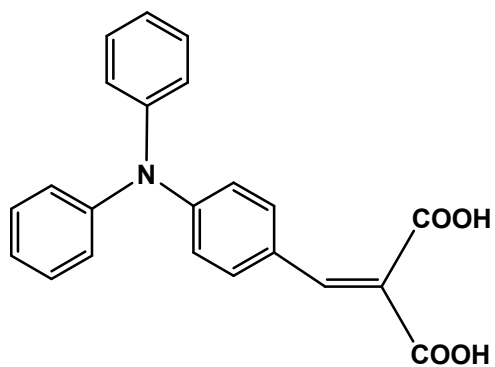

**Fig. S1.** Structure of the TPA-dye.

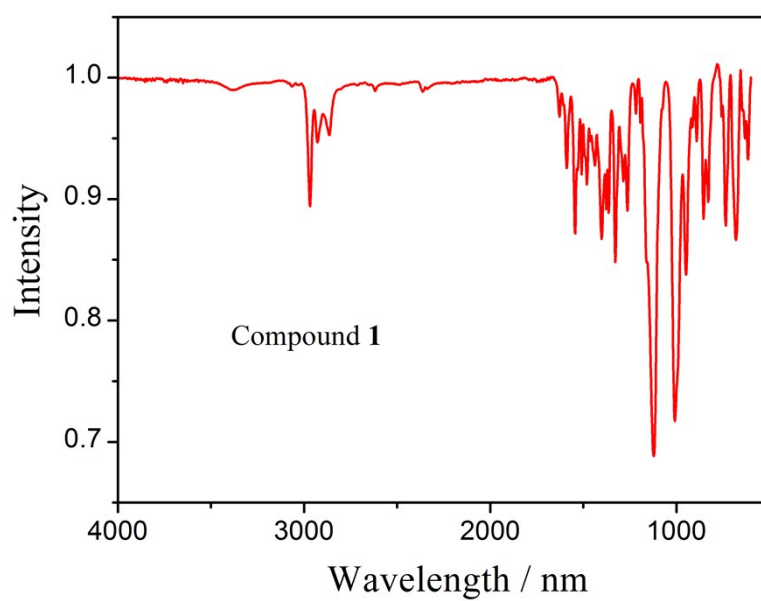

**Fig. S2.** IR spectra of compound 1.

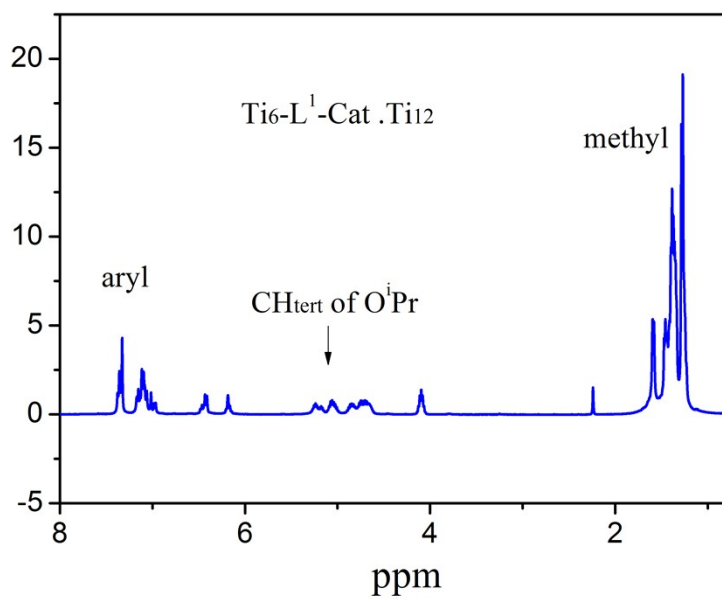

Fig. S3.  $^1\text{H}$  NMR spectra of compound 1.

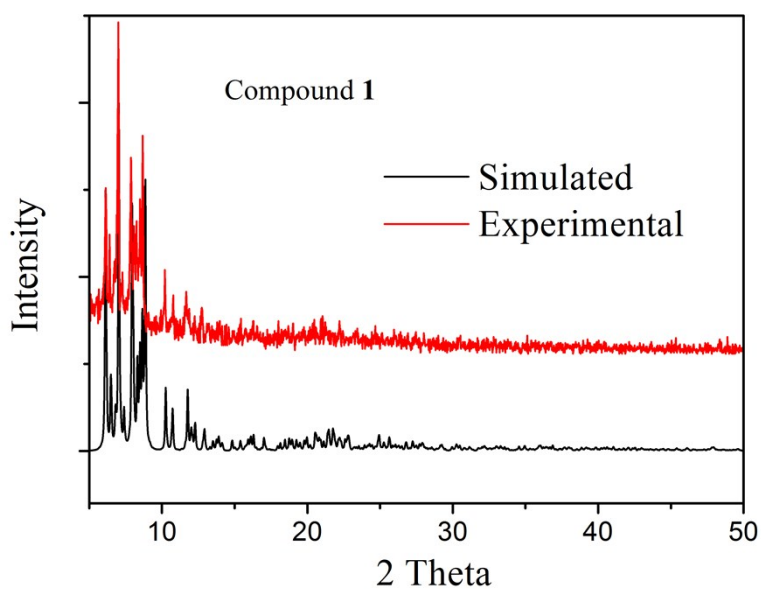

Fig. S4. The XRD patterns of crystalline sample 1.

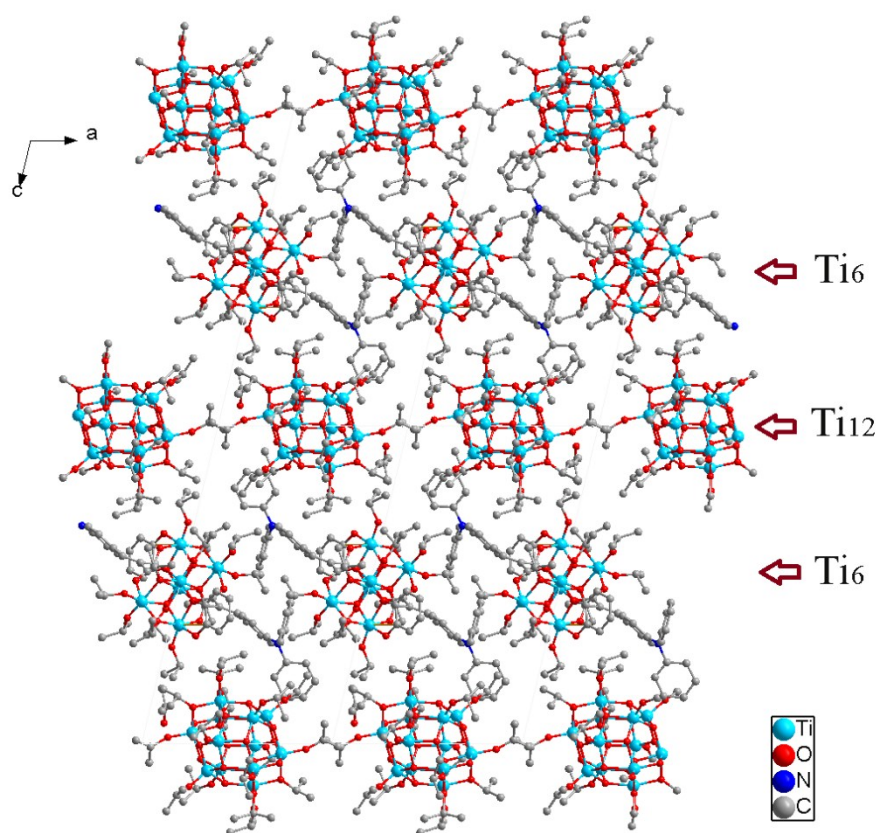

Fig. S5. Molecular packing of 1.

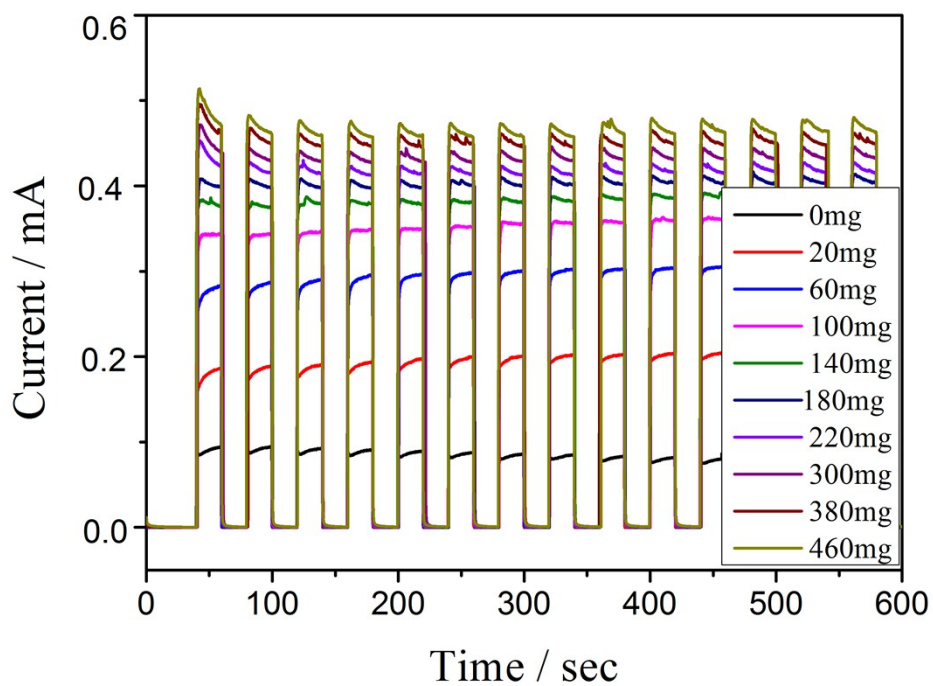

**Fig. S6.** Photocurrents of **1** treated electrode with different amount of fructose (three electrode system with a Pt auxiliary electrode and an SEC reference electrode in a water solution of  $0.1 \text{ mmol}\cdot\text{L}^{-1} \text{ Na}_2\text{SO}_4$ ).

**Table S1** Crystal data and structural refinement parameters for **1**

|                                                             | <b>1</b>                                                                          |
|-------------------------------------------------------------|-----------------------------------------------------------------------------------|
| formula                                                     | C <sub>146</sub> H <sub>250</sub> N <sub>2</sub> O <sub>60</sub> Ti <sub>18</sub> |
| fw                                                          | 3855.13                                                                           |
| cryst size (mm <sup>3</sup> )                               | 0.10 × 0.20 × 0.30                                                                |
| cryst syst                                                  | triclinic                                                                         |
| space group                                                 | <i>P</i> $\bar{1}$                                                                |
| <i>a</i> (Å)                                                | 14.1466(18)                                                                       |
| <i>b</i> (Å)                                                | 15.6568(19)                                                                       |
| <i>c</i> (Å)                                                | 23.301(3)                                                                         |
| $\alpha$ (deg)                                              | 99.803(3)                                                                         |
| $\beta$ (deg)                                               | 99.129(4)                                                                         |
| $\gamma$ (deg)                                              | 108.462(3)                                                                        |
| <i>V</i> (Å <sup>3</sup> )                                  | 4697.5(10)                                                                        |
| <i>Z</i>                                                    | 1                                                                                 |
| $\rho_{\text{calcd}}$ (g cm <sup>-3</sup> )                 | 1.363                                                                             |
| <i>F</i> (000)                                              | 2016                                                                              |
| $\mu$ (mm <sup>-1</sup> )                                   | 0.794                                                                             |
| <i>T</i> (K)                                                | 120(2)                                                                            |
| reflns collected                                            | 59771                                                                             |
| unique reflns                                               | 17091                                                                             |
| observed reflns                                             | 10634                                                                             |
| no. params                                                  | 1084                                                                              |
| GOF on <i>F</i> <sup>2</sup>                                | 1.028                                                                             |
| <i>R</i> <sub>1</sub> [ <i>I</i> > 2 $\sigma$ ( <i>I</i> )] | 0.0571                                                                            |
| <i>wR</i> <sub>2</sub>                                      | 0.1658                                                                            |
